# Supplementary material for: Advanced heart sound analysis as a new prognostic marker in stable coronary artery disease
Source: PubMed Central journal article supplement — Eur Heart J Digit Health. 2021 Mar 19;2(2):279–89. doi: 10.1093/ehjdh/ztab031 (PMC9707929; doi:10.1093/ehjdh/ztab031), 2021-03-19
Supplement: ztab031_supplementary_material.pdf [file ztab031_supplementary_material.pdf]

## Supplementary

### Therapeutic initiatives based on the baseline cardiac evaluation in Dan-NICAD

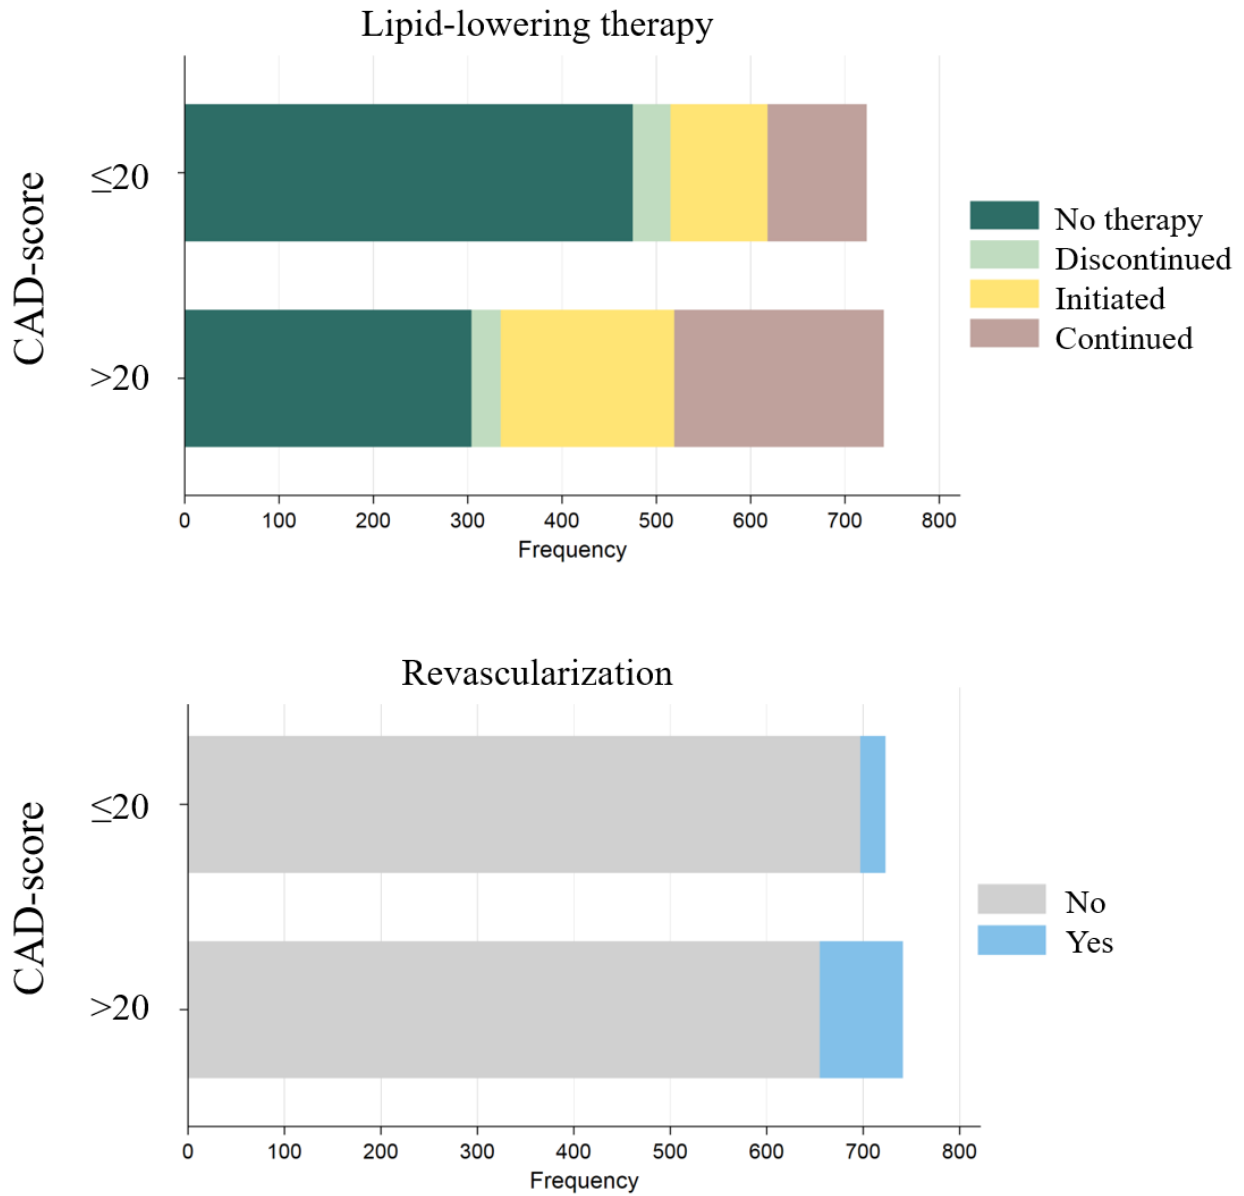

Figure S1

Changes in lipid-lowering therapy and revascularization performed as part of the baseline cardiac evaluation, which might have altered patient prognosis after the acoustic record.

Figure S2, Cumulative incidence rates for the acoustic-score and CAD-score

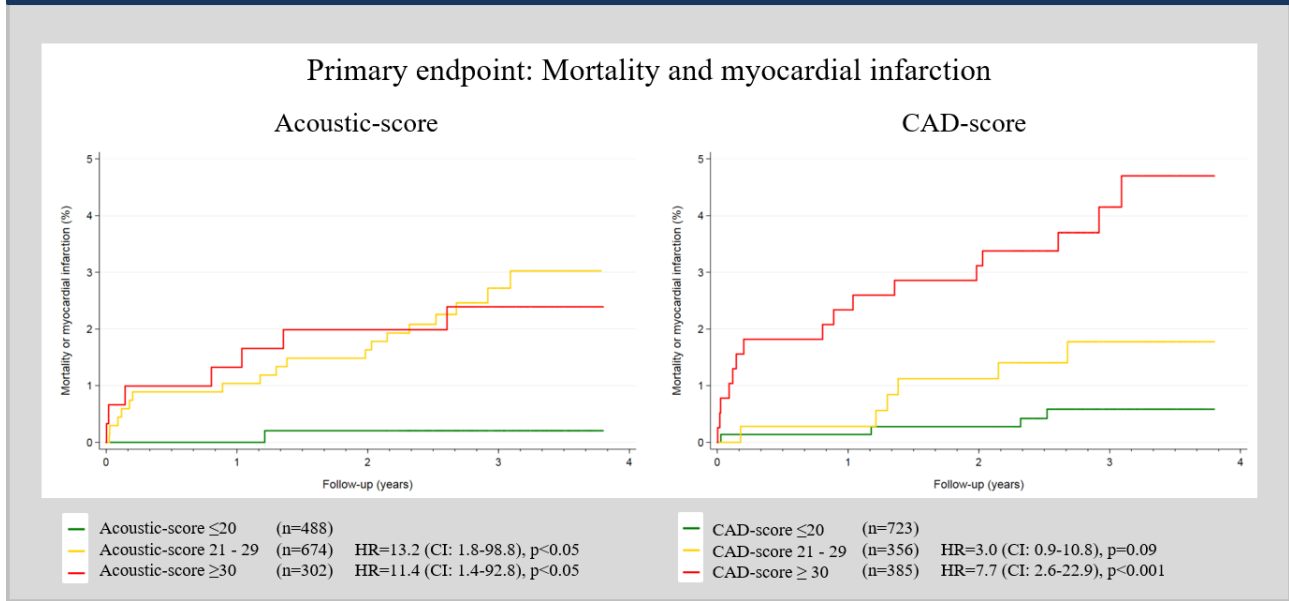

Figure S2, Primary endpoints according to Acoustic-score and CAD-score with a pre-specified cut-offs of  $\leq 20$  and  $\geq 30$ .

**Figure S3, Cumulative incidence rates for “Worst case scenario” simulation**

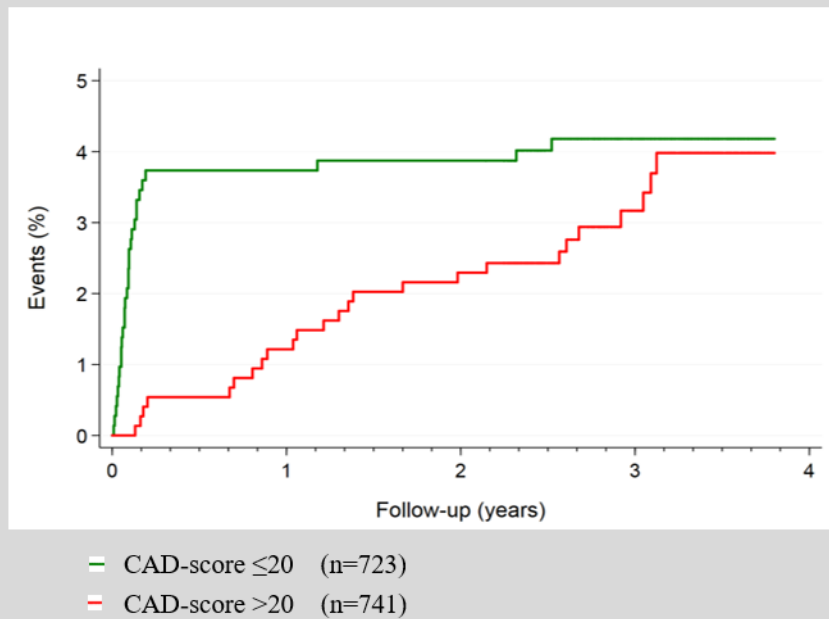

Figure S3, “Worst case scenario” simulating an event in all patients with revascularization as part of the primary baseline cardiac evaluation and with a false negative CAD-score  $\leq 20$  (n=26). Events is defined as mortality, myocardial infarction, revascularization not part of the primary baseline evaluation, and revascularization as part of the primary cardiac evaluation with CAD-score  $\leq 20$ .

| Table S1, Excluded patient demographics |             |
|-----------------------------------------|-------------|
| Number of patients                      | 211         |
| Characteristic                          |             |
| Race, Caucasian                         | 208 (98.6%) |
| Sex, male                               | 97 (46.0%)  |
| Age (years)                             | 57.5 ±8.8   |
| Genetic predisposition*                 | 67 (32.8.%) |
| Body Mass Index (kg/m <sup>2</sup> )    | 28.1 ±5.3   |
| Abdominal circumference (cm)            | 96.7 ±13.6  |
| Blood pressure                          |             |
| - Systolic                              | 138 ±20     |
| - Diastolic                             | 83 ±12      |
| Heart rate <sup>#</sup>                 | 66 ±14      |
| Smoking                                 |             |
| - Never                                 | 88 (43.3%)  |
| - Former                                | 78 (38.4%)  |
| - Active                                | 37 (18.2%)  |
| Diabetes                                | 15 ( 7.4%)  |
| Symptoms                                |             |
| Typical chest pain                      | 49 (24.5%)  |
| Atypical chest pain                     | 69 (34.5%)  |
| Non-specific                            | 82 (41.0%)  |
| Updated Diamond Forrester score         |             |
| - Low risk (<15%)                       | 25 (12.5%)  |
| - Moderate risk (≥15% to 85%)           | 168 (84.0%) |
| - High risk (≥85%)                      | 7 ( 3.5%)   |
| Reasons for missing acoustic CAD-score  |             |
| Analysis not performed                  | 16 ( 7.6%)  |
| Arrhythmia                              | 49 (23.2%)  |
| Too much noise or too weak heart signal | 50 (23.6%)  |
| IC4 could not be identified             | 48 (22.7%)  |
| Device-related problems                 | 29 (13.7%)  |
| Short systolic period                   | 14 ( 6.6%)  |
| Other                                   | 5 ( 2.4%)   |

Table S1, Excluded patient demographics and reasons for missing CAD-score. Symptoms and many baseline characteristics were missing in 11 patients. Values are n (%) or mean ±SD or median [IQR].

| Table S2, Table of CAD-score and Acoustic-score |                          |                       |               |
|-------------------------------------------------|--------------------------|-----------------------|---------------|
|                                                 | Acoustic-score $\leq 20$ | Acoustic-score $> 20$ | Total         |
| CAD-score $\leq 20$                             | 342 (23.3%)              | 381 (26.0%)           | 723 (49.4%)   |
| CAD-score $> 20$                                | 146 (10.0%)              | 595 (40.6%)           | 741 (50.6%)   |
| Total                                           | 488 (33.3%)              | 667 (66.7%)           | 1464 (100.0%) |

Table S2, 2x2 table with Acoustic-score and CAD-score with a pre-specified cut-off of  $> 20$ . Values are n (%)

| Table S3, Description of patients with false negative CAD-score at baseline |            |        |                 |                |           |                         |                                |      |     |
|-----------------------------------------------------------------------------|------------|--------|-----------------|----------------|-----------|-------------------------|--------------------------------|------|-----|
| Patient                                                                     | Age, years | Sex    | Chest pain type | Acoustic-score | CAD-score | Diamond-Forrester score | ICA with FFR Core-lab analysis | CABG | PCI |
| 1                                                                           | 44         | Female | Atypical        | 11.3           | 3.2       | 13.5                    | 1-vessel disease               | No   | Yes |
| 2                                                                           | 54         | Female | Atypical        | 12.2           | 4.6       | 19.3                    | 2-vessel disease               | No   | Yes |
| 3                                                                           | 50         | Female | Typical         | 12.4           | 4.6       | 41.8                    | 2-vessel disease               | Yes  | No  |
| 4                                                                           | 50         | Female | Typical         | 14.2           | 5.0       | 41.8                    | 1-vessel disease               | No   | Yes |
| 5                                                                           | 46         | Female | Atypical        | 20.4           | 5.0       | 14.5                    | 1-vessel disease               | No   | Yes |
| 6                                                                           | 48         | Female | Atypical        | 21.3           | 5.3       | 15.6                    | 1-vessel disease               | No   | Yes |
| 7                                                                           | 50         | Female | Nonspecific     | 15.3           | 5.3       | 9.7                     | 1-vessel disease               | No   | Yes |
| 8                                                                           | 44         | Male   | Typical         | 19.5           | 7.5       | 68.0                    | 2-vessel disease               | No   | Yes |
| 9                                                                           | 46         | Female | Atypical        | 30.9           | 8.4       | 14.5                    | 1-vessel disease               | No   | Yes |
| 10                                                                          | 68         | Male   | Atypical        | 10.9           | 8.9       | 62.5                    | 1-vessel disease               | Yes  | No  |
| 11                                                                          | 55         | Male   | Atypical        | 17.4           | 9.0       | 48.9                    | 1-vessel disease               | No   | Yes |
| 12                                                                          | 44         | Male   | Nonspecific     | 24.3           | 9.3       | 24.0                    | 2-vessel disease               | No   | Yes |
| 13                                                                          | 45         | Male   | Nonspecific     | 25.0           | 9.6       | 24.8                    | 1-vessel disease               | Yes  | No  |
| 14                                                                          | 47         | Male   | Typical         | 25.4           | 9.8       | 70.7                    | 1-vessel disease               | Yes  | Yes |
| 15                                                                          | 63         | Female | Atypical        | 22.0           | 9.8       | 26.0                    | No obstructive disease         | No   | Yes |
| 16                                                                          | 64         | Male   | Atypical        | 23.4           | 15.3      | 58.4                    | 2-vessel disease               | No   | Yes |
| 17                                                                          | 64         | Male   | Nonspecific     | 23.9           | 15.5      | 42.7                    | 1-vessel disease               | No   | Yes |
| 18                                                                          | 65         | Male   | Typical         | 24.9           | 16.2      | 83.9                    | 1-vessel disease               | No   | Yes |
| 19                                                                          | 54         | Female | Typical         | 14.7           | 16.5      | 46.0                    | 3-vessel or LM disease         | Yes  | No  |
| 20                                                                          | 52         | Male   | Typical         | 32.6           | 17.1      | 74.9                    | Missing                        | Yes  | No  |
| 21                                                                          | 42         | Female | Typical         | 22.8           | 17.8      | 33.8                    | 2-vessel disease               | No   | Yes |
| 22                                                                          | 41         | Male   | Nonspecific     | 14.2           | 18.0      | 21.8                    | 1-vessel disease               | No   | Yes |
| 23                                                                          | 57         | Male   | Nonspecific     | 34.6           | 18.5      | 35.5                    | 2-vessel disease               | Yes  | No  |
| 24                                                                          | 53         | Female | Atypical        | 18.7           | 19.2      | 18.7                    | 2-vessel disease               | No   | Yes |
| 25                                                                          | 65         | Male   | Nonspecific     | 29.6           | 19.3      | 43.7                    | 3-vessel or LM disease         | Yes  | No  |
| 26                                                                          | 55         | Male   | Typical         | 36.5           | 19.9      | 77.3                    | 1-vessel disease               | No   | Yes |

Table S3, Detailed description of clinical information and imaging characteristics of the patients who were early revascularized as part of the baseline cardiac evaluation and had a CAD-score  $\leq 20$ .

**Table S4, Description of patients with event during follow-up**

| Patient | Event  | Age, years | Sex    | Chest pain type | Acoustic-score | CAD-score | Diamond-Forrester score | ICA with FFR Core-lab analysis | CABG | PCI |
|---------|--------|------------|--------|-----------------|----------------|-----------|-------------------------|--------------------------------|------|-----|
| 1       | Death  | 58         | Male   | Typical         | 21.5           | 10.8      | 79.4                    | Na                             | No   | No  |
| 2       | Death  | 69         | Female | Typical         | 24.8           | 11.1      | 61.8                    | Na                             | No   | No  |
| 3       | Death  | 56         | Male   | Nonspecific     | 27.2           | 13.8      | 34.6                    | No disease                     | No   | No  |
| 4       | Death  | 66         | Male   | Atypical        | 26.4           | 17.2      | 60.5                    | No disease                     | No   | No  |
| 5       | Revasc | 50         | Female | Typical         | 20.1           | 20.3      | 41.8                    | 3-vessel or LM disease         | Yes  | No  |
| 6       | Revasc | 44         | Male   | Atypical        | 19.2           | 21.6      | 37.4                    | 2-vessel disease               | Yes  | No  |
| 7       | MI     | 55         | Female | Atypical        | 23.8           | 23.0      | 20.0                    | 1-vessel disease               | No   | No  |
| 8       | Death  | 58         | Female | Nonspecific     | 25.8           | 24.6      | 13.1                    | No disease                     | No   | No  |
| 9       | Revasc | 62         | Male   | Nonspecific     | 12.5           | 26.0      | 40.6                    | No disease                     | No   | No  |
| 10      | Death  | 74         | Female | Typical         | 18.5           | 28.6      | 66.7                    | 3-vessel or LM disease         | Yes  | No  |
| 11      | Death  | 54         | Male   | Nonspecific     | 22.0           | 28.6      | 32.6                    | No disease                     | No   | No  |
| 12      | Death  | 55         | Male   | Typical         | 22.6           | 29.2      | 77.3                    | 1-vessel disease               | No   | No  |
| 13      | Revasc | 73         | Female | Atypical        | 19.2           | 29.2      | 35.1                    | No disease                     | No   | No  |
| 14      | Death  | 62         | Female | Atypical        | 26.1           | 29.8      | 25.2                    | No disease                     | No   | No  |
| 15      | Death  | 51         | Male   | Nonspecific     | 24.4           | 30.6      | 29.9                    | 1-vessel disease               | No   | No  |
| 16      | Death  | 58         | Female | Atypical        | 34.3           | 31.4      | 22.1                    | No disease                     | No   | No  |
| 17      | MI*    | 51         | Male   | Atypical        | 25.9           | 31.8      | 44.6                    | 3-vessel or LM disease         | Yes  | No  |
| 18      | MI*    | 53         | Male   | Atypical        | 27.7           | 33.2      | 46.7                    | 1-vessel disease               | No   | No  |
| 19      | MI     | 56         | Male   | Atypical        | 28.2           | 33.7      | 49.9                    | No disease                     | No   | No  |
| 20      | Death  | 54         | Male   | Nonspecific     | 29.2           | 34.5      | 32.6                    | No disease                     | No   | No  |
| 21      | MI*    | 71         | Female | Typical         | 26.5           | 35.0      | 63.8                    | 3-vessel or LM disease         | Yes  | No  |
| 22      | MI     | 63         | Male   | Typical         | 25.3           | 36.3      | 82.7                    | 2-vessel disease               | No   | Yes |
| 23      | MI     | 78         | Female | Typical         | 28.9           | 36.9      | 70.4                    | 2-vessel disease               | No   | Yes |
| 24      | Revasc | 63         | Male   | Typical         | 28.5           | 38.7      | 82.7                    | No disease                     | No   | No  |
| 25      | MI     | 49         | Male   | Typical         | 42.1           | 39.7      | 72.5                    | 1-vessel disease               | No   | Yes |
| 26      | Death  | 71         | Male   | Typical         | 24.3           | 40.2      | 87.1                    | Na                             | No   | No  |
| 27      | MI     | 62         | Male   | Nonspecific     | 32.0           | 41.2      | 40.6                    | No disease                     | No   | No  |
| 28      | MI     | 67         | Male   | Typical         | 34.6           | 43.1      | 85.0                    | 3-vessel or LM disease         | Yes  | No  |
| 29      | Revasc | 73         | Male   | Nonspecific     | 30.0           | 44.0      | 52.2                    | 3-vessel or LM disease         | Yes  | No  |
| 30      | Death  | 68         | Male   | Atypical        | 37.5           | 44.9      | 62.5                    | 1-vessel disease               | No   | Yes |
| 31      | Death  | 65         | Male   | Atypical        | 40.5           | 46.6      | 59.4                    | 3-vessel or LM disease         | Yes  | No  |
| 32      | Death  | 53         | Male   | Typical         | 49.5           | 48.2      | 75.7                    | 1-vessel disease               | Yes  | No  |

Table S4, Detailed description of clinical information and imaging characteristics of the patients had events, death, myocardial infarction , or late revascularization, during follow-up.

\* Late revascularization also performed.

MI: Myocardial infarction, Revasc: Late revascularization.
